# Supplementary material for: An AQbD driven stability indicating HPLC method for simultaneous estimation of lamivudine, tenofovir disoproxil fumarate and efavirenz in plasma
Source: Royal Society of Chemistry journal article supplement (doi:10.1039/d4ay02080d), 2025-01-01
Supplement: d4ay02080d1.pdf [file d4ay02080d1.pdf]

## Supplementary Information (SI)

### **AQbD driven stability indicating HPLC method for simultaneous estimation of lamivudine, tenofovir disoproxil fumarate and efavirenz in plasma**

Avichal Kumar<sup>a</sup>, Vanita Somasekhar<sup>b</sup>, Sumit Dhiman<sup>c,d</sup>, Shivakumar Hagalavadi Nanjappa<sup>a\*</sup> and Dhruvi Avlani<sup>a</sup>

<sup>a</sup> Department of Pharmaceutics, Dr. Prabhakar B Kore Basic Science Research Center, Off-campus, KLE College of Pharmacy (A constituent unit of KAHER-Belagavi), Rajajinagar, Bengaluru 560010 Karnataka, India

<sup>b</sup> Department of Pharmaceutical Analysis, KLE College of Pharmacy (A constituent unit of KAHER-Belagavi), Rajajinagar, Bengaluru 560010 Karnataka, India

<sup>c</sup> Pharmacology Division, CSIR-Indian Institute of Integrative Medicine, Jammu 180001, India

<sup>d</sup> Academy of Scientific and Innovative Research (AcSIR), Ghaziabad 201002, India

#### **\*Correspondence**

Shivakumar HN

Dept of Pharmaceutics

KLE College of Pharmacy, Bangalore 560 010, India

Off: +91-80-23325611, Fax: +91-80-23425373, Mob: +91-9448241420

Email: [shivakumarhn@gmail.com](mailto:shivakumarhn@gmail.com)

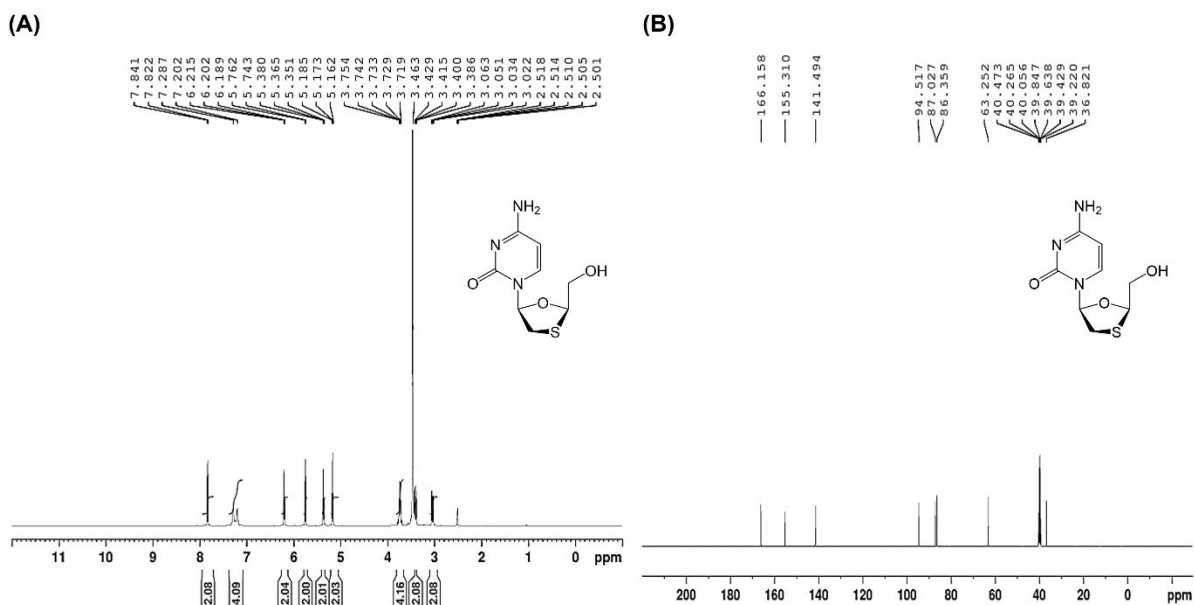

**Fig. S1-** The  $^1\text{H}$  NMR (A) and  $^{13}\text{C}$  NMR (B) spectra of the pure drug Lamivudine (LVD). (7.84-7.82)-d, 1H 6th position of pyridine ring; (7.28-7.20) – 2 S, 2 H of  $-\text{NH}_2$  ;(6.21-6.18) – t, 1 H of 5th position 5'' of oxathiolane ring; (5.76-5.74) – d, 1 H of 5th position of pyridine ring; (5.38-5.35) – t, 1 H of  $-\text{OH}$ ; (5.18-5.16) – t, 2nd position of oxathiolane ring; (3.75-3.71) – m, 2 H of  $-\text{CH}_2$  attached at 2'' of oxathiolane ring; (3.06-3.02) – dd, 2 H of 4th position 4'' of oxathiolane ring. 166.158 (1C, 4th position of pyridine ring – C4); 155.310 (1C,  $-\text{C}=\text{O}$  carbonyl carbon at 2nd position of pyridine ring – C2); 141.494 (1C, 6th position of pyridine ring - C6); 94.517 (1C, 5th position of oxathiolane ring – 5''); 87.027 (1C, 5th position of pyridine ring – C5); 86.359 (1C, 2nd position of oxathiolane ring – 2''); 63.252 (1C,  $-\text{CH}_2\text{OH}$  attached at 2nd position of oxathiolane ring); 36.821 (1C, 4th position of oxathiolane ring – 4'')

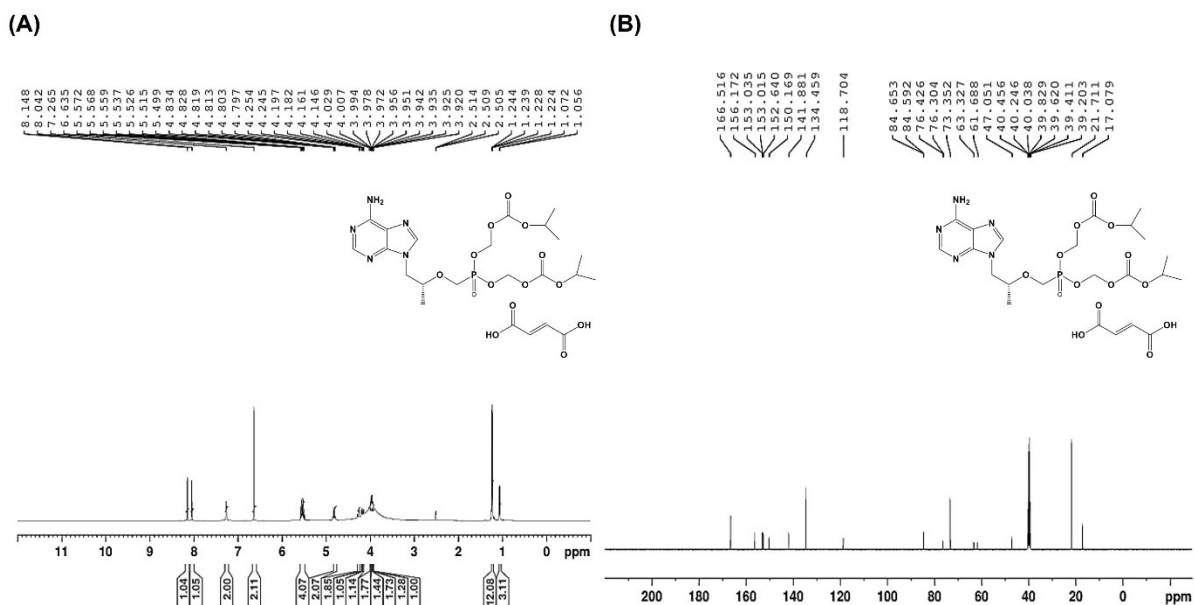

**Fig. S2-** The <sup>1</sup>H NMR (A) and <sup>13</sup>C NMR (B) spectra of the pure drug Tenofvir Disoproxil Fumarate (TDF).

<sup>1</sup>H NMR: 8.14 (s, 2nd position of purine ring); 8.04 (s, 8th position of purine ring); 7.265 (s, 2H of -NH<sub>2</sub>); 6.635 (s, 4H of methylene of two side chains - 5''); 5.499 (m, 2H of methine 6'' position); 4.83-4.79 (td, 2H of methylene attached to N at 9<sup>th</sup> position of purine ring - 1''); 4.25-4.14 (qd, 2H of -OCH<sub>2</sub> attached to P - 4''); 4.02-3.92 (m, 1H of -CH of methine at 2'' position); 1.244-1.22 (d, 12 H of four terminal methyl groups); 1.07-1.05 (d, 3 H of -CH<sub>3</sub> at 3'' position).

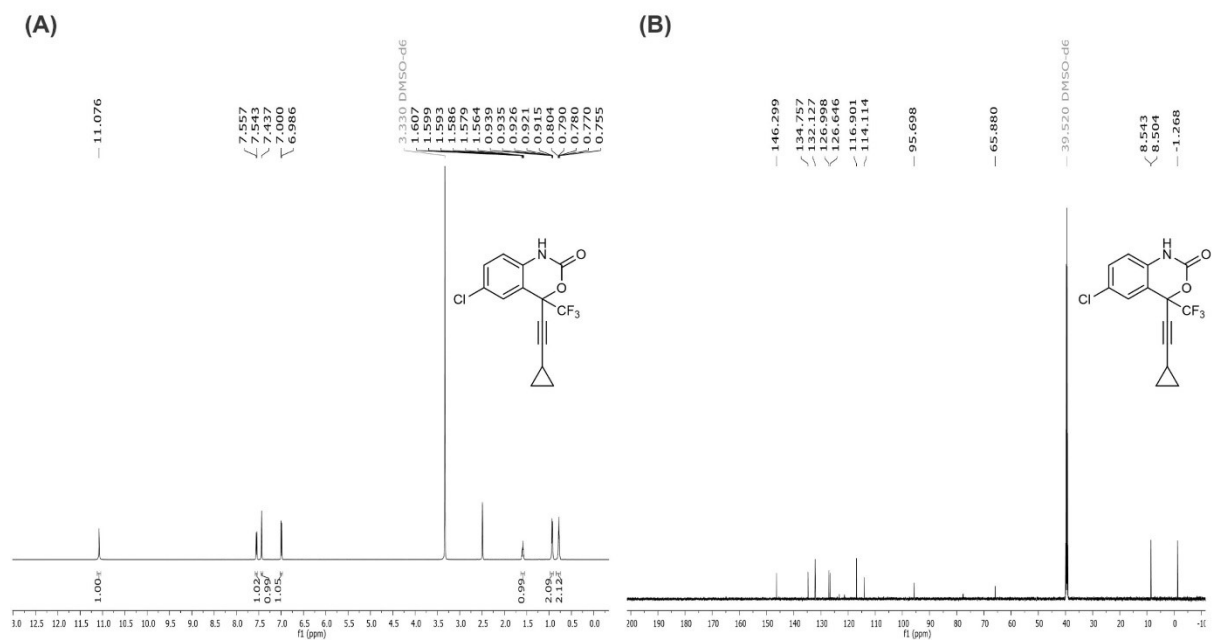

**Fig. S3-** The <sup>1</sup>H NMR (A) and <sup>13</sup>C NMR (B) spectra of the pure drug Efavirenz (EFZ). 11.076 (s, 1H, -NH); 7.557 (d, 1H, Ar-H); 7.437 (s, 1H, Ar-H); 1.607, 1.599, 1.593, 1.586, 1.579, 1.564(m, 1H, cyclopropyl ring; 0.939, 0.935, 0.926, 0.921, 0.915, 0.804, 0.790, 0.780, 0.770, 0.755 (m, 4H, cyclopropyl ring); -1.26 (1C, cyclopropyl ring); 8.5, 8.5 (2C, cyclopropyl ring); 65.8 (1C, 4th C of benzoxazin-2-one ring); 95.69 (2C, -C triple bond -C); 116.9 (1C, -CF<sub>3</sub>); 126.6 (1C, -C-Ar); 126.99 (2C, 5th & 7th position of benzoxazine-2-one ring); 132.1 (1C, -C-Cl); 134.75 (1C, -C-Ar); 146.2 (1C, -C=O at 2nd position of benzoin-2-one ring).

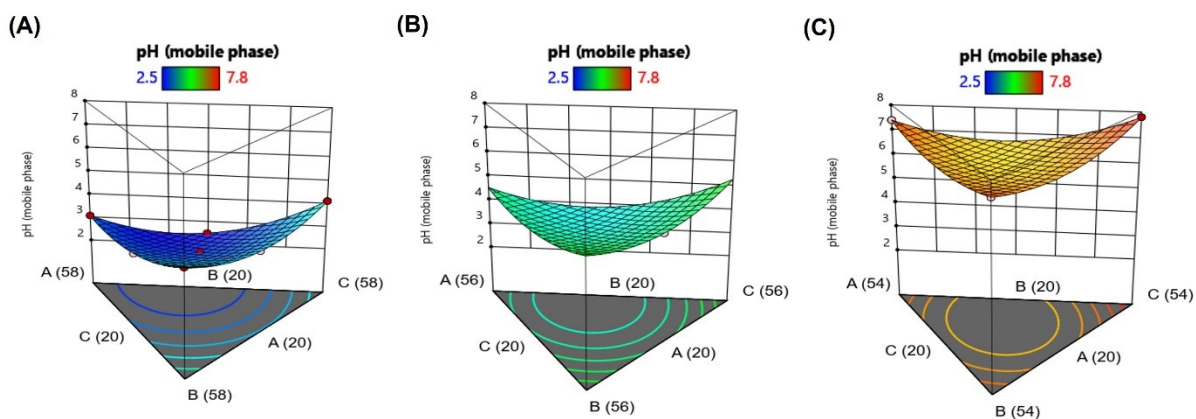

**Fig. S4-** 3D surface graphs showing the final pH changes after incorporating KOH at concentrations of 2% (A), 4% (B), and 6% (C) with acetonitrile, methanol, and buffer. The graphs are color-coded, with blue representing low values ( $2.5 \pm 0.1$ ) and red indicating high values ( $7.8 \pm 0.3$ ).

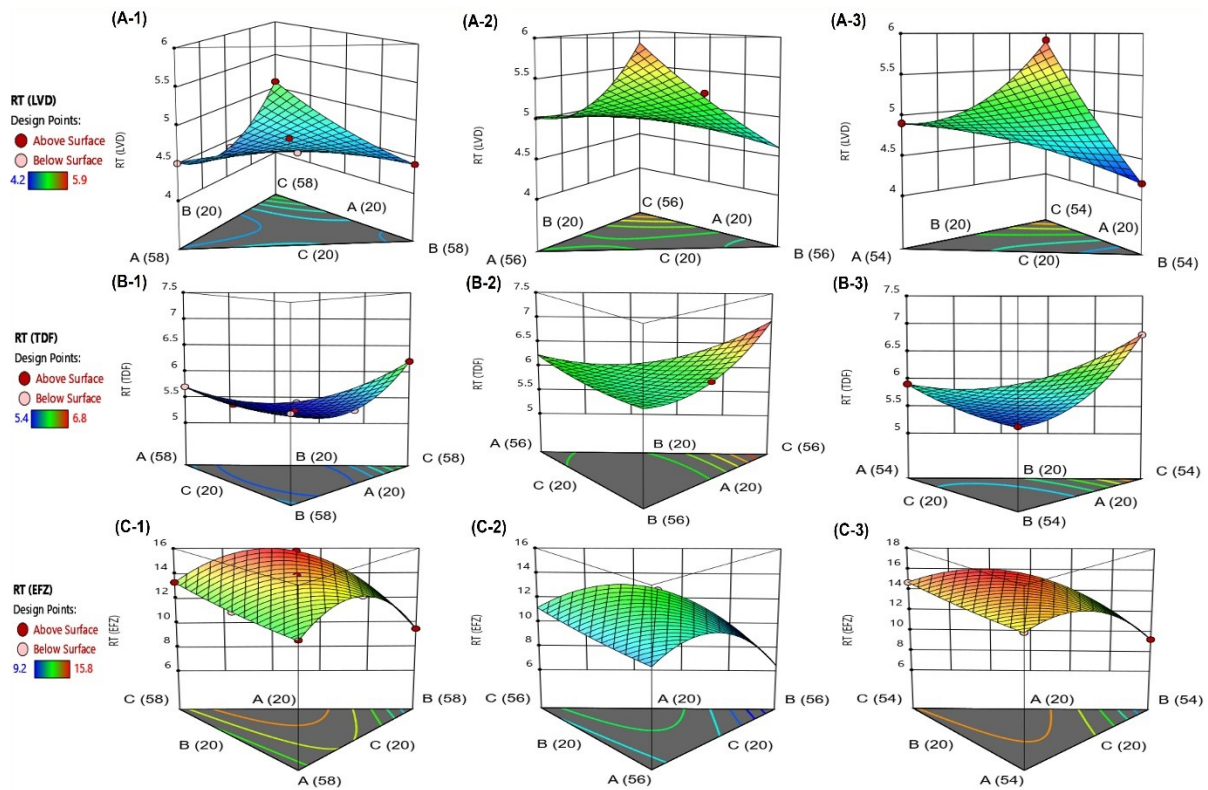

**Fig. S5-** 3D surface graphs showing the effect of organic phase on RT for Lamivudine (LVD) (A-1, A-2, A-3), Tenofovir Disoproxil Fumarate (TDF) (B-1, B-2, B-3) and Efavirenz (EFZ) (C-1, C-2, C-3) respectively. The graphs are color-coded, with blue representing low values and red indicating high values.

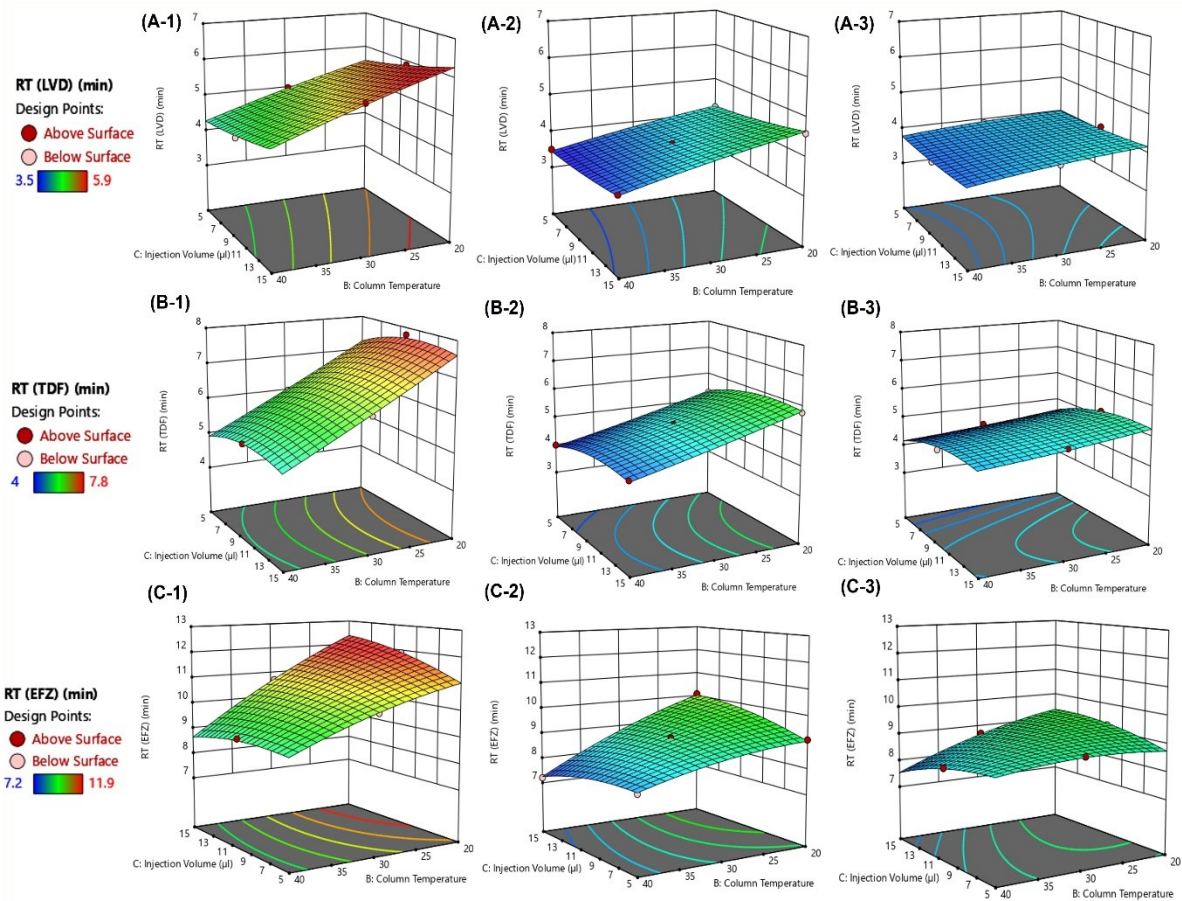

**Fig. S6-** 3D surface graphs showing the effect of flow rate on RT for Lamivudine (LVD) (A-1, A-2, A-3), Tenofovir Disoproxil Fumarate (TDF) (B-1, B-2, B-3) and Efavirenz (EFZ) (C-1, C-2, C-3) respectively. The graphs are color-coded, with blue representing low values and red indicating high values.

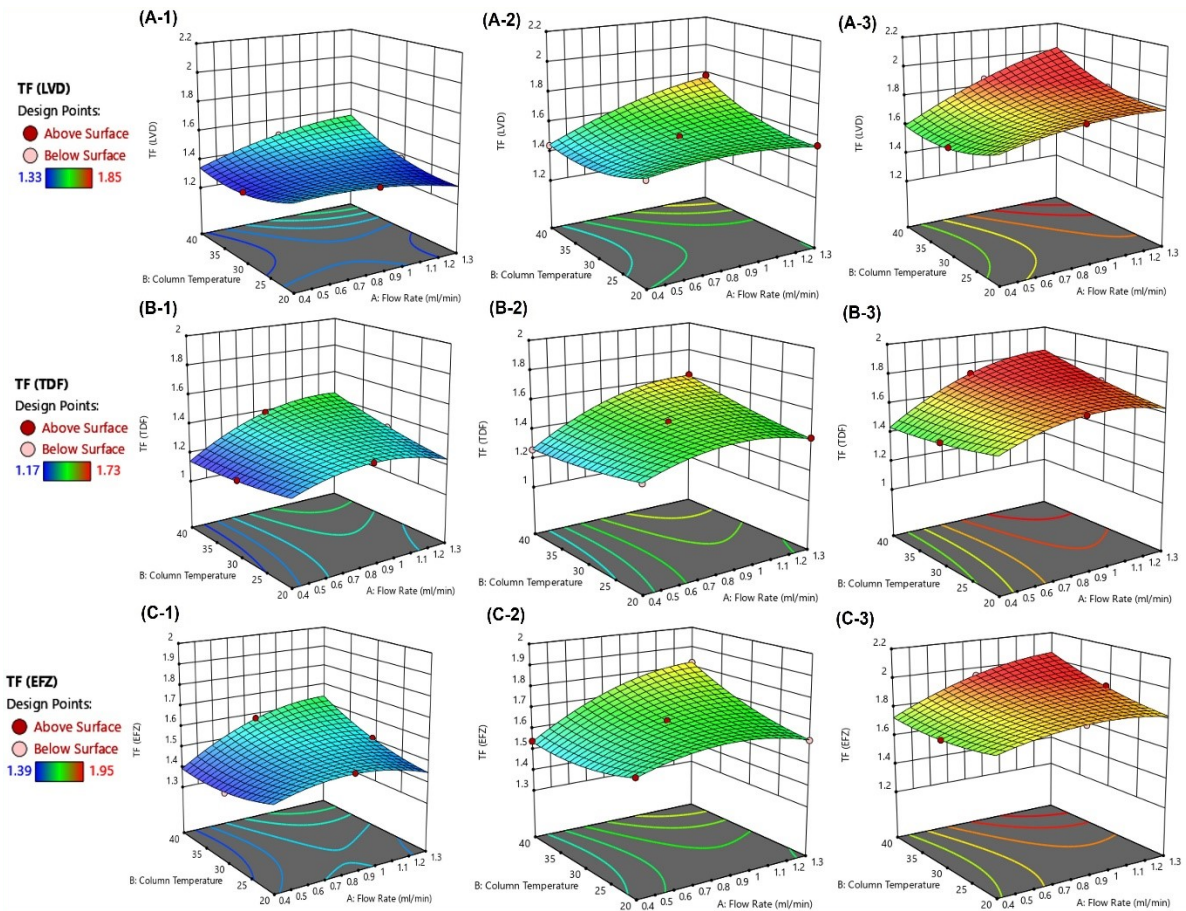

**Fig. S7-** 3D surface graphs showing the effect of injection volume on TF for Lamivudine (LVD) (A-1, A-2, A-3), Tenofovir Disoproxil Fumarate (TDF) (B-1, B-2, B-3) and Efavirenz (EFZ) (C-1, C-2, C-3) respectively. The graphs are color-coded, with blue representing low values and red indicating high values.



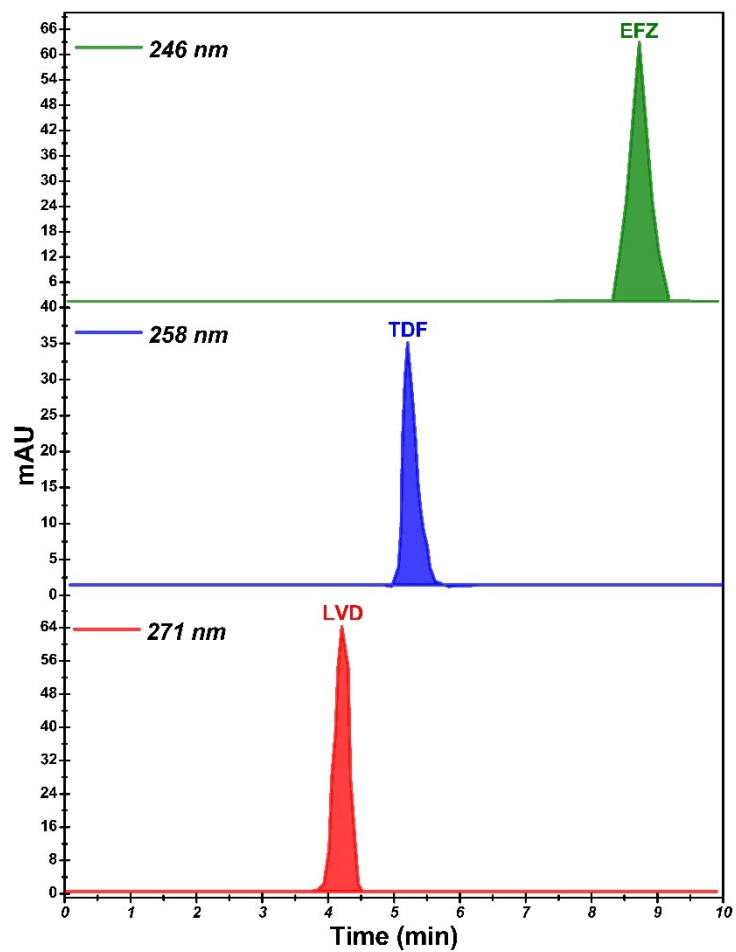

**Fig. S8-** The individual HPLC chromatograms of the developed method are shown for Lamivudine (LVD) at  $4.1 \pm 0.2$  min, Tenofovir Disoproxil Fumarate (TDF) at  $5.1 \pm 0.3$  min, and Efavirenz (EFZ) at  $8.6 \pm 0.4$  min.

**Table S1:** The details of the linearity data for the antiretroviral agents Lamivudine (LVD), Tenofovir Disoproxil Fumarate (TDF), and Efavirenz (EFZ).

| Sample | Concentration ( $\mu\text{g/ml}$ ) | Peak Area |       |
|--------|------------------------------------|-----------|-------|
|        |                                    | Mean      | S.D.  |
| LVD    | 0.25                               | 6219      | 345   |
|        | 1.25                               | 10946     | 478   |
|        | 2.5                                | 24278     | 539   |
|        | 5                                  | 48768     | 594   |
|        | 10                                 | 98935     | 791   |
|        | 20                                 | 203627    | 1691  |
|        | 40                                 | 393276    | 11815 |
|        | 80                                 | 758154    | 14853 |
| TDF    | 0.25                               | 13986     | 445   |
|        | 1.25                               | 24282     | 678   |
|        | 2.5                                | 68264     | 739   |
|        | 5                                  | 120658    | 1494  |
|        | 10                                 | 246064    | 2791  |
|        | 20                                 | 418635    | 3991  |
|        | 40                                 | 927446    | 16815 |
|        | 80                                 | 1779196   | 29853 |
| EFZ    | 0.25                               | 20688     | 345   |
|        | 1.25                               | 43501     | 478   |
|        | 2.5                                | 92065     | 539   |
|        | 5                                  | 183933    | 1584  |
|        | 10                                 | 321305    | 2978  |
|        | 20                                 | 745908    | 6691  |
|        | 40                                 | 1425802   | 46815 |
|        | 80                                 | 2799721   | 49853 |

**Table S2:** The details of the robustness data for the antiretroviral agents Lamivudine (LVD), Tenofovir Disoproxil Fumarate (TDF), and Efavirenz (EFZ).

| Parameter                                    |                  | LVD       |     |      | TDF       |      |      | EFZ       |      |      |
|----------------------------------------------|------------------|-----------|-----|------|-----------|------|------|-----------|------|------|
|                                              |                  | Mean Area | SD  | %RSD | Mean Area | SD   | %RSD | Mean Area | SD   | %RSD |
| Column                                       | 41.95            | 99314     | 748 | 0.75 | 248917    | 1648 | 0.66 | 339527    | 2617 | 0.77 |
| Temperature (°C)                             | 36.95            | 98921     | 630 | 0.64 | 232564    | 1791 | 0.77 | 323465    | 2596 | 0.80 |
|                                              | 31.95            | 97584     | 647 | 0.66 | 217953    | 1627 | 0.75 | 318051    | 2307 | 0.73 |
| Flow Rate (ml/min)                           | 0.817            | 96752     | 629 | 0.65 | 225961    | 1539 | 0.68 | 319426    | 2285 | 0.72 |
|                                              | 0.617            | 98426     | 598 | 0.60 | 245867    | 1934 | 0.78 | 327547    | 2751 | 0.84 |
|                                              | 0.417            | 99854     | 574 | 0.57 | 251977    | 1978 | 0.79 | 341859    | 2563 | 0.74 |
| Mobile Phase (ACN : Methanol : Buffer : KOH) | 27 : 48 : 23 : 2 | 97452     | 755 | 0.77 | 237896    | 1603 | 0.67 | 308316    | 2347 | 0.76 |
|                                              | 25 : 46 : 25 : 4 | 98217     | 612 | 0.62 | 243771    | 1749 | 0.72 | 317481    | 2726 | 0.89 |
|                                              | 23 : 44 : 27 : 6 | 98783     | 671 | 0.67 | 263816    | 2165 | 0.82 | 327609    | 2297 | 0.70 |

**Table S3:** The details of the accuracy data for the antiretroviral agents Lamivudine (LVD), Tenofovir Disoproxil Fumarate (TDF), and Efavirenz (EFZ).

| <b>Sample</b> | <b>Concentration<br/>(<math>\mu\text{g/ml}</math>)</b> | <b>Mean Recovered Concentration<br/>(<math>\mu\text{g/ml}</math>)</b> | <b>Accuracy<br/>(% w/w)</b> |
|---------------|--------------------------------------------------------|-----------------------------------------------------------------------|-----------------------------|
| LVD           | 8 (80%)                                                | 7.96                                                                  | 99.58                       |
|               | 10 (100%)                                              | 9.93                                                                  | 99.35                       |
|               | 12 (120%)                                              | 12.14                                                                 | 101.22                      |
| TDF           | 8 (80%)                                                | 7.97                                                                  | 99.72                       |
|               | 10 (100%)                                              | 9.98                                                                  | 99.85                       |
|               | 12 (120%)                                              | 12.16                                                                 | 101.37                      |
| EFZ           | 8 (80%)                                                | 7.99                                                                  | 99.91                       |
|               | 10 (100%)                                              | 9.96                                                                  | 99.64                       |
|               | 12 (120%)                                              | 12.22                                                                 | 101.83                      |
